# Supplementary material for: Isomangiferin, a Novel Potent Vascular Endothelial Growth Factor Receptor 2 Kinase Inhibitor, Suppresses Breast Cancer Growth, Metastasis and Angiogenesis
Source: PubMed Central journal article supplement — J Breast Cancer. 2018 Mar 23;21(1):11–20. doi: 10.4048/jbc.2018.21.1.11 (PMC5880961; doi:10.4048/jbc.2018.21.1.11), 2018-03-23
Supplement: jbc-21-11-s001.pdf [file jbc-21-11-s001.pdf]

**Supplementary Table 1.** *In vitro* VEGFR-2 kinase inhibition by isomangiferin

| Compound      | VEGFR-2<br>Kinase activity<br>IC <sub>50</sub> (nM) |
|---------------|-----------------------------------------------------|
| Isomangiferin | 820.67                                              |
| SU5408        | 72.42                                               |

VEGFR-2 = vascular endothelial growth factor receptor 2; IC<sub>50</sub> = half maximal inhibitory concentration obtained in *in vitro* VEGFR-2 kinase assays.
